# Supplementary material
Source: PubMed Central journal article supplement (PMC5385284)

### Figure E1.

**Panel A controls for Figure 1: (A-B)** Immunofluorescent staining for c-Kit (green), chymase (green), and DAPI (blue) in mouse skin showing the negativity of isotype control antibody staining; **(C-F)** qPCR analysis of the controls of non-toluidine blue-positive cells collected by laser capture microdissection.

**Panel B controls for Figure 2: (G)** Immunofluorescent staining for LTA (red) and DAPI (blue) in mouse skin showing the negativity of isotype control antibody staining; **(H-J)** Primary normal human keratinocytes (NHEK) immunostained with anti-LTA monoclonal antibody (red) and DAPI (blue). Keratinocytes were treated with isotype control (H), PBS (I) or LTA at 10 µg/ml for 24 h (J).

**Panel C controls for Figure 3: (K)** Immunofluorescent staining for TLR2 (red) and DAPI (blue) in mouse skin showing the negativity of isotype control antibody staining **(L)** qPCR analysis of *Tlr2* expression in MCs collected by laser capture microdissection based on toluidine blue staining of skin from SPF and GF mice.

### Figure E2. TLR2 expression in MCs co-cultured with connective tissue components and TLR2 (LTA) and TLR4 (LPS) ligands.

FACS analysis of TLR2 expression in mouse bone marrow-derived MCs after 7 days of co-culture with different components of skin connective tissue and TLR2 (LTA) and TLR4 (LPS) ligands. Murine MCs were cultured in normal media with added PBS **(A)**, hyaluronic acid 10 µg/ml **(B)**, LPS 100 ng/ml **(C)**, LTA 10 µg/ml **(D)**, or they were cultured in plates coated with collagen type I **(E)**, fibronectin **(F)**, or gelatin **(G)**. Isotype control is shown in **(H)**.

**(I) *Tlr2* expression in mouse keratinocytes:** qPCR analysis of *Tlr2* expression in primary isolated mouse skin keratinocytes before and after stimulation with LTA at 10 µg/ml. (\*\*p<0.01, \*\*\*p<0.001)

### Figure E3. SCF expression in keratinocytes and fibroblasts.

**(A)** qPCR analysis of *SCF* in primary human keratinocytes after stimulation with LTA at 10µg/ml; **(B)** ELISA quantification of SCF in primary human keratinocytes after stimulation with LTA at 10µg/ml; **(C)** ELISA quantification of SCF in primary isolated mouse keratinocytes and fibroblasts after stimulation with LTA at 10µg/ml; **(D)** ELISA quantification of SCF in mouse fibroblasts isolated from the skins of K14-cre and K14-cre *Scf<sup>fl/fl</sup>* mice; **(E-F)** SCF (green) and DAPI (blue) immunostaining of the skins of K14-cre **(E)** and K14-cre *Scf<sup>fl/fl</sup>* mice **(F)**. The inset shows a magnification of the squared area in the image; **(G-H)** SCF (green) and DAPI (blue) immunostaining in dermal fibroblasts isolated from K14-cre **(G)** and K14-cre *Scf<sup>fl/fl</sup>* mice **(H)**. The inset shows that these mice have normal fibroblast morphology. (\*p<0.05, \*\*p<0.01, \*\*\*p<0.001)

### Figure E4. Melanocytes in K14-cre *Scf<sup>fl/fl</sup>* mice.

**(A-E)** Melanocyte-marker HMB45 (red) and DAPI (blue) immunofluorescent staining reveals normal numbers of melanocytes in the skins of K14-cre adults and newborn pups **(A and C)**, while K14-cre *Scf<sup>fl/fl</sup>* adults and newborn pups lack normal numbers of melanocytes in the skin **(B and D)**. **(E)** Isotype control for anti-HMB45 antibody plus secondary antibody. **(F)** Intradermal injection (i.d.) of SCF (500 ng/mouse) every 2 days for 12 days induced hyperpigmentation in K14-cre mice, but failed to recover pigmentation in K14-cre *Scf<sup>fl/fl</sup>* mice.

### Figure E5. SCF expression in different tissues of K14-cre *Scf<sup>fl/fl</sup>* mice.

**(A-D)** Immunofluorescent staining of SCF (green) or chymase (green) and DAPI (blue) reveals normal levels of SCF and MCs in the small intestine of K14-cre **(A and B)** and K14-cre *Scf<sup>fl/fl</sup>* mice **(C and D)**; **(E)** *Scf* expression was assayed by qPCR from bone marrow cells extracted from the femurs of mice; **(F-G)** SCF (green) and DAPI (blue) immunofluorescent staining in the skins of K14-cre *Scf<sup>fl/fl</sup>* **(F)** and K14-cre **(G)** newborn pups; **(H-I)** Chymase (green) and DAPI (blue) immunofluorescent staining in the skins of K14-cre *Scf<sup>fl/fl</sup>* **(H)** and K14-cre **(I)** newborn pups.

### Table E1.

Blood analysis: White Blood Cell (WBC) and Red Blood Cell (RBC) counts and differentials of K14-cre *Scf<sup>fl/fl</sup>*, K14-cre, and wild-type C57 mice. There is no significant difference in hematology between K14-cre *Scf<sup>fl/fl</sup>* mice and control mice.

**Table E1**

| Species   |            | K14-cre <i>Scf<sup>fl/fl</sup></i> |       |       | K14-cre |       |       | Wild type C57 |       |       |
|-----------|------------|------------------------------------|-------|-------|---------|-------|-------|---------------|-------|-------|
| Sample ID |            | 1                                  | 2     | 3     | 1       | 2     | 3     | 1             | 2     | 3     |
| WBC       | K/ $\mu$ L | 6.58                               | 6.94  | 6.86  | 7.7     | 7.76  | 9.24  | 9.18          | 9.64  | 9.88  |
| NE#       | K/ $\mu$ L | 0.33                               | 1.11  | 1.02  | 0.68    | 0.66  | 0.6   | 0.6           | 1.06  | 1.07  |
| LY#       | K/ $\mu$ L | 5.77                               | 5.13  | 5.24  | 6.32    | 6.48  | 8.15  | 8.15          | 7.9   | 8.14  |
| MO#       | K/ $\mu$ L | 0.44                               | 0.55  | 0.46  | 0.68    | 0.61  | 0.44  | 0.4           | 0.64  | 0.62  |
| EO#       | K/ $\mu$ L | 0.03                               | 0.11  | 0.11  | 0.01    | 0.01  | 0.03  | 0.02          | 0.03  | 0.04  |
| BA#       | K/ $\mu$ L | 0.01                               | 0.03  | 0.03  | 0.01    | 0     | 0.01  | 0.02          | 0     | 0.01  |
| NE%       | %          | 4.99                               | 16.03 | 14.89 | 8.88    | 8.46  | 6.54  | 6.5           | 10.97 | 10.84 |
| LY%       | %          | 87.68                              | 73.97 | 76.33 | 82.11   | 83.46 | 88.25 | 88.74         | 81.98 | 82.34 |
| MO%       | %          | 6.75                               | 7.9   | 6.72  | 8.82    | 7.89  | 4.74  | 4.33          | 6.67  | 6.32  |
| EO%       | %          | 0.45                               | 1.65  | 1.59  | 0.13    | 0.15  | 0.36  | 0.26          | 0.36  | 0.44  |
| BA%       | %          | 0.12                               | 0.45  | 0.46  | 0.07    | 0.04  | 0.1   | 0.17          | 0.02  | 0.07  |
| RBC       | M/ $\mu$ L | 9.26                               | 11.46 | 11.79 | 9.74    | 9.36  | 9.98  | 9.75          | 9.29  | 9.45  |
| HB        | g/dL       | 12.9                               | 14.9  | 15.4  | 14.2    | 14.1  | 13.7  | 13.5          | 12.8  | 13    |
| HCT       | %          | 39.7                               | 45.7  | 45.3  | 41.4    | 41    | 38.1  | 38.1          | 36.9  | 37.7  |
| MCV       | fL         | 42.9                               | 39.9  | 38.4  | 42.5    | 43.8  | 38.2  | 39.1          | 39.7  | 39.9  |
| MCH       | Pg         | 13.9                               | 13    | 13.1  | 14.6    | 15.1  | 13.7  | 13.8          | 13.8  | 13.8  |
| MCHC      | g/dL       | 32.5                               | 32.6  | 34    | 34.3    | 34.4  | 36    | 35.4          | 34.7  | 34.5  |
| RDW       | %          | 16.9                               | 21.1  | 20.2  | 18.6    | 19.2  | 17.6  | 18.5          | 19.8  | 19.8  |
| PLT       | K/ $\mu$ L | 411                                | 644   | 653   | 925     | 952   | 881   | 900           | 1061  | 1158  |
| MPV       | fL         | 6                                  | 5.1   | 5     | 4.6     | 4.6   | 5.1   | 5.1           | 4.4   | 4.4   |

**Figure E1**

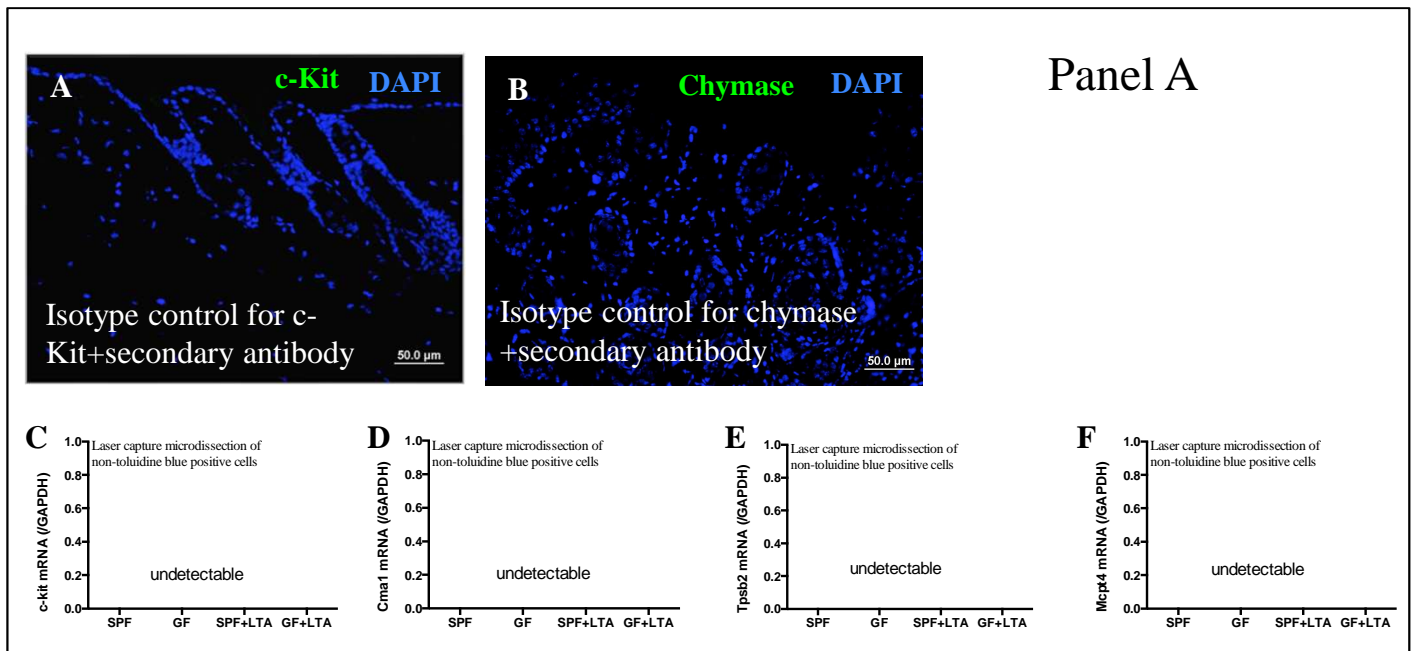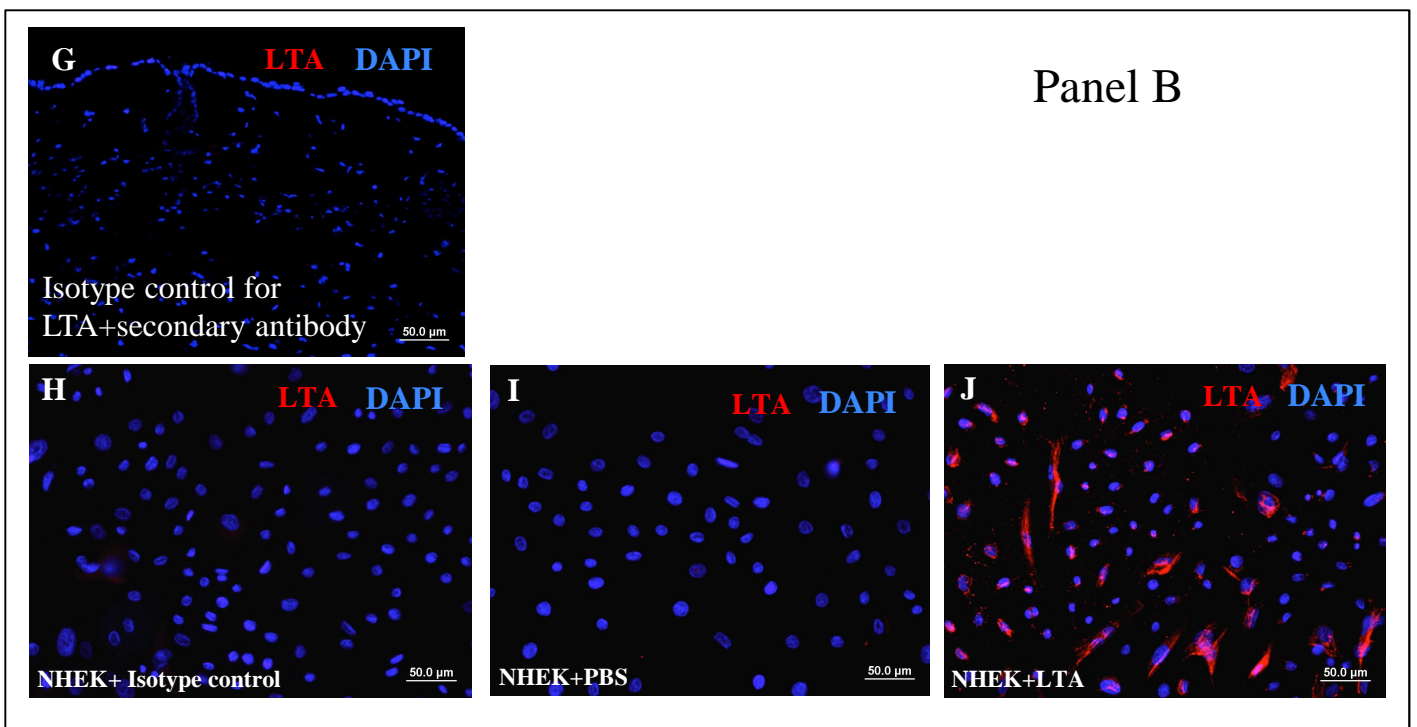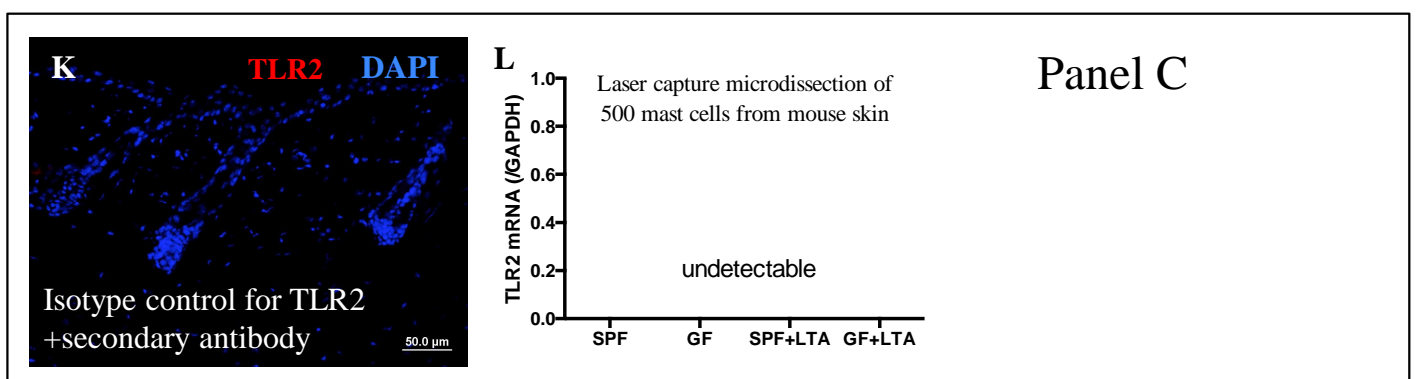

**Figure E2**

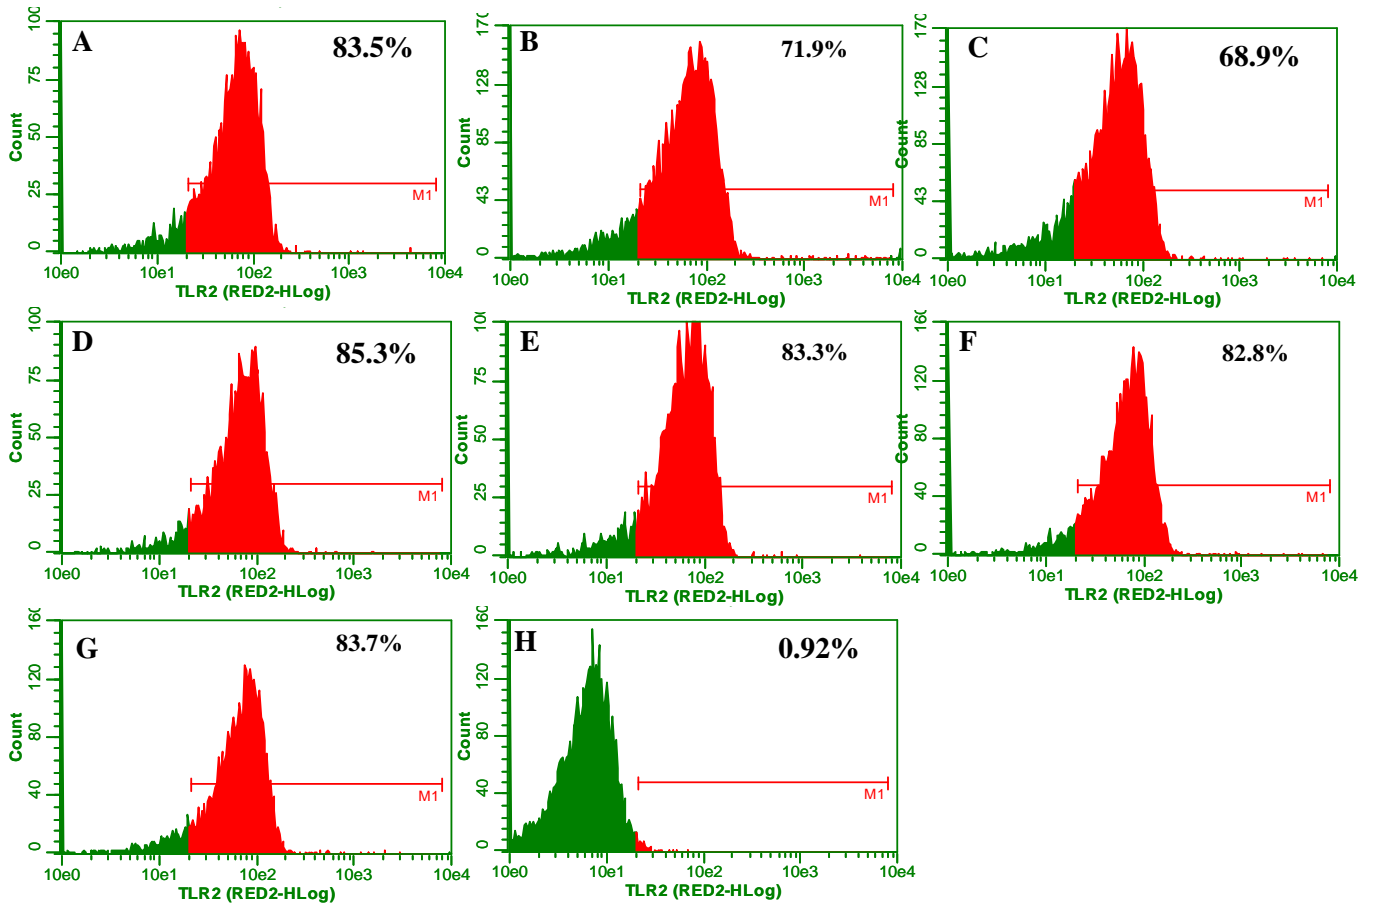

**I** Primary epidermal keratinocytes

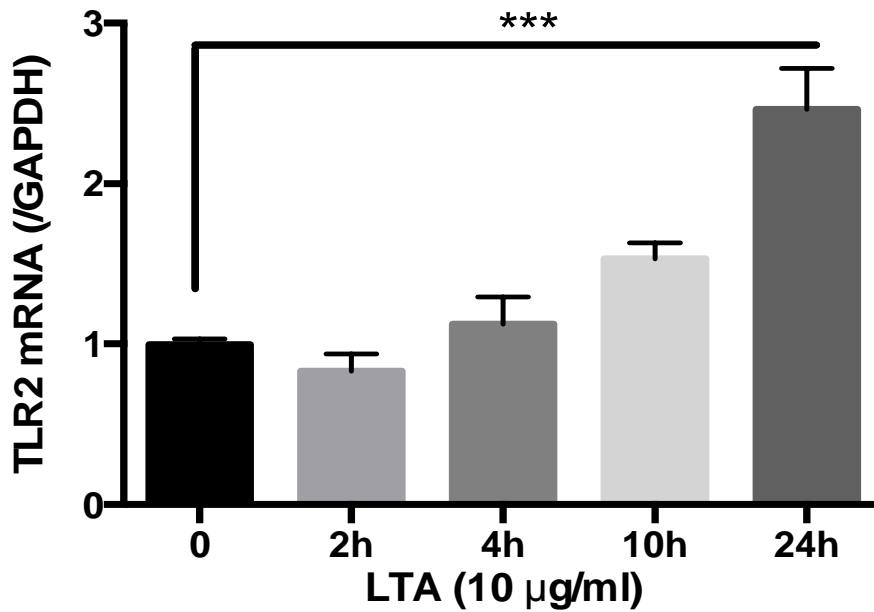

**Figure E3**

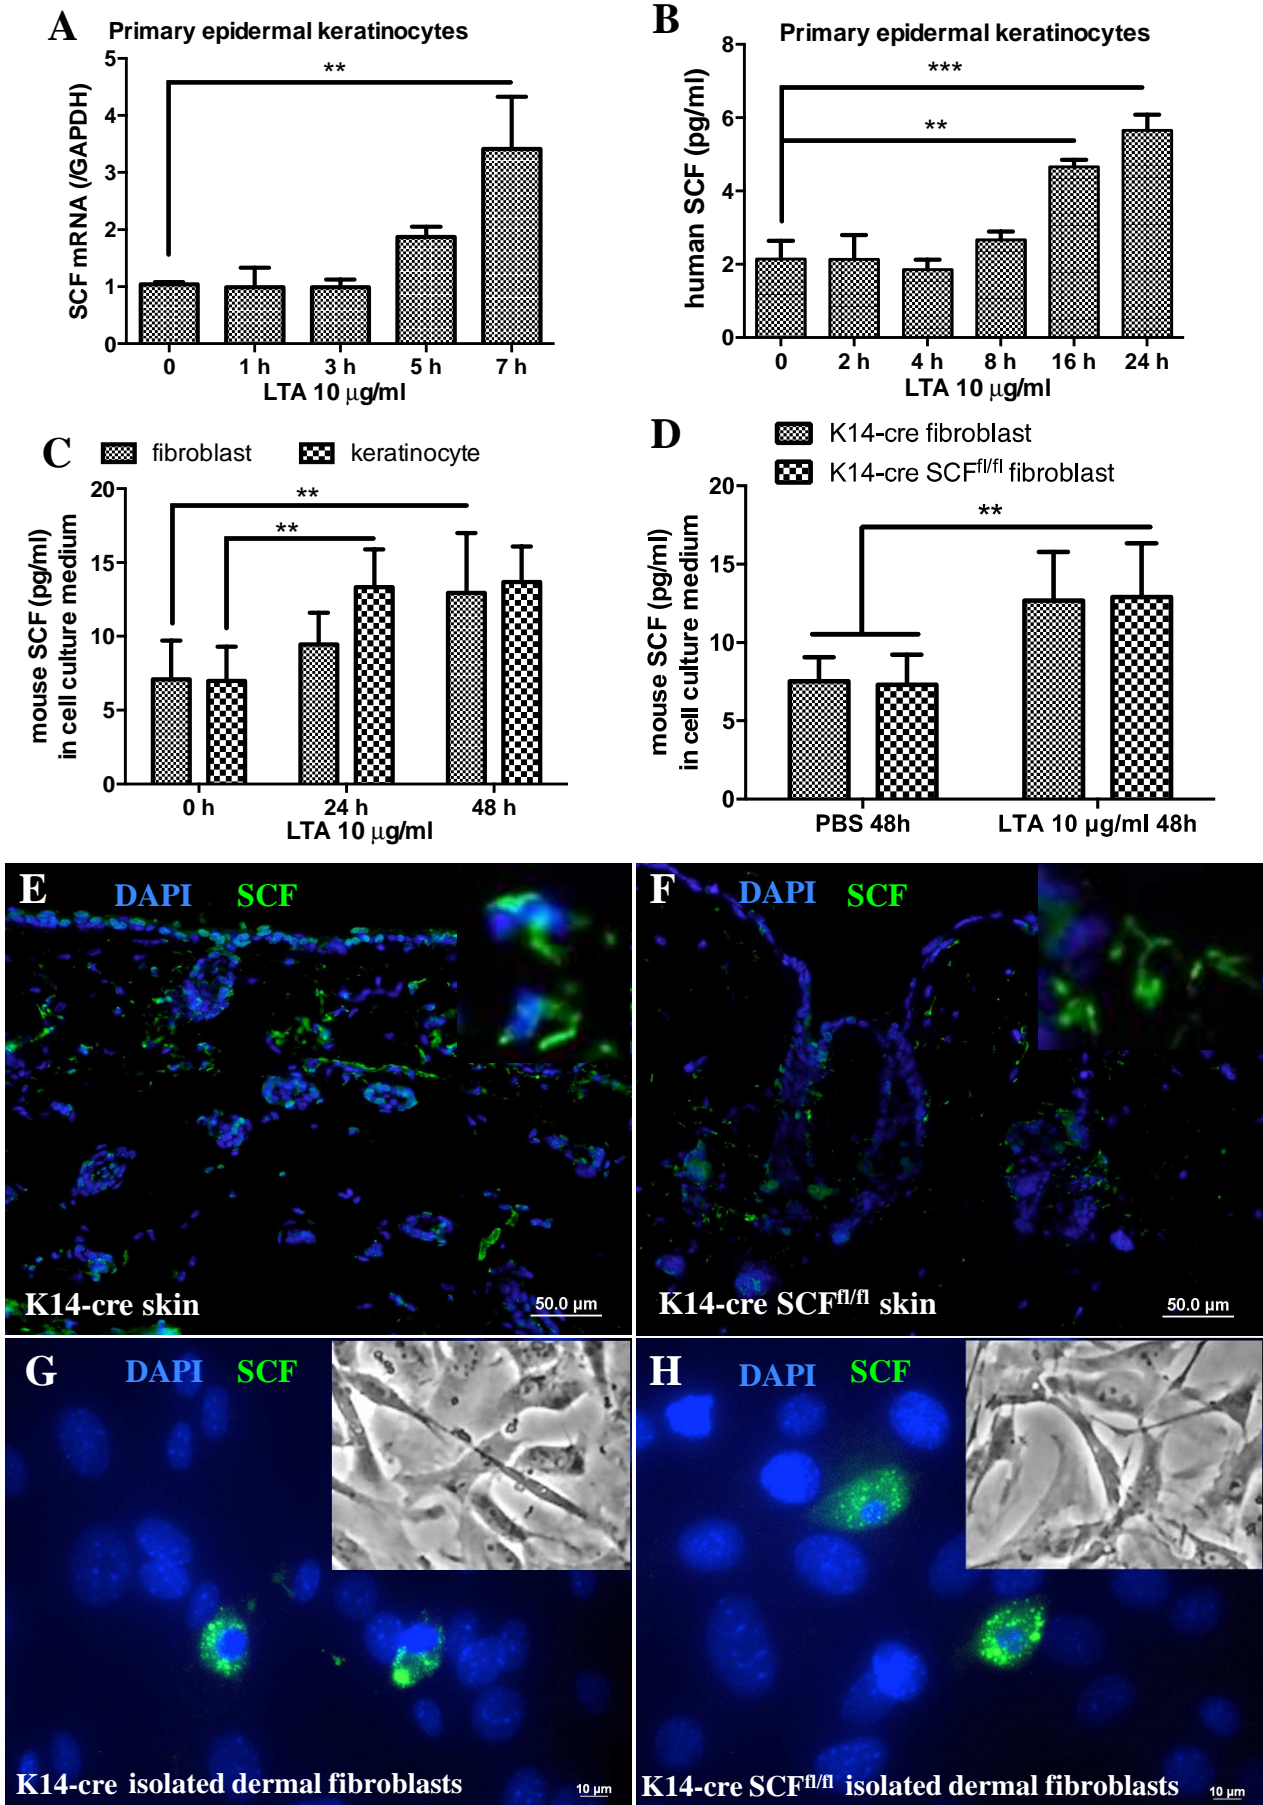

Figure E4

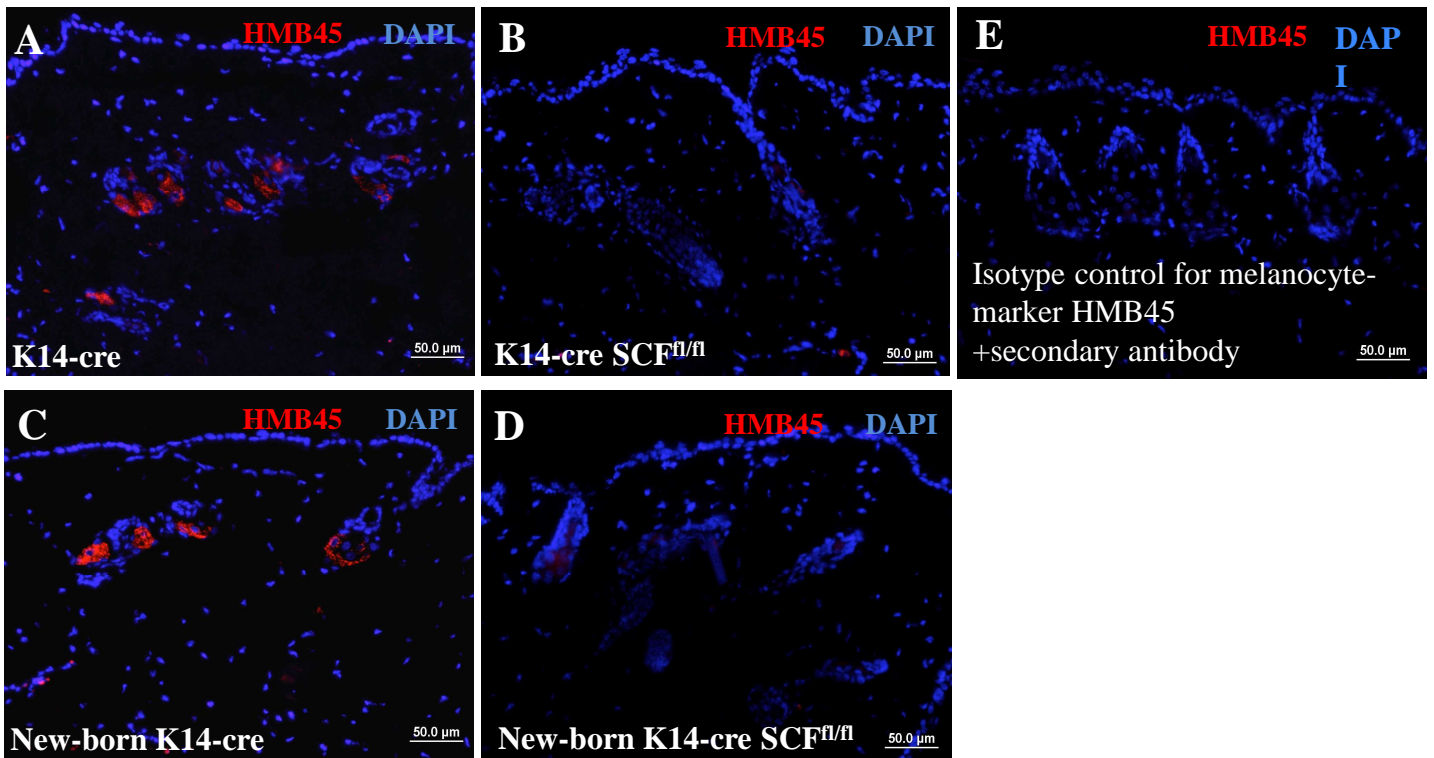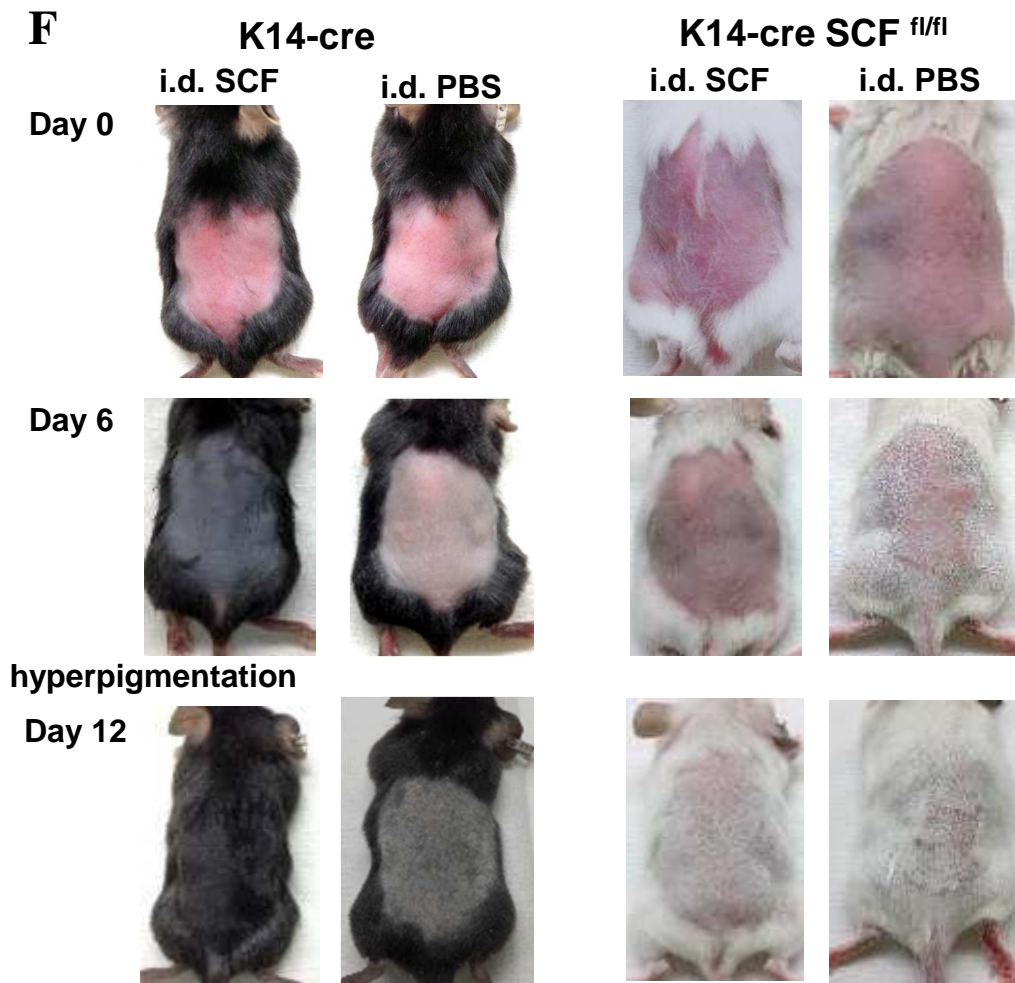

Figure E5

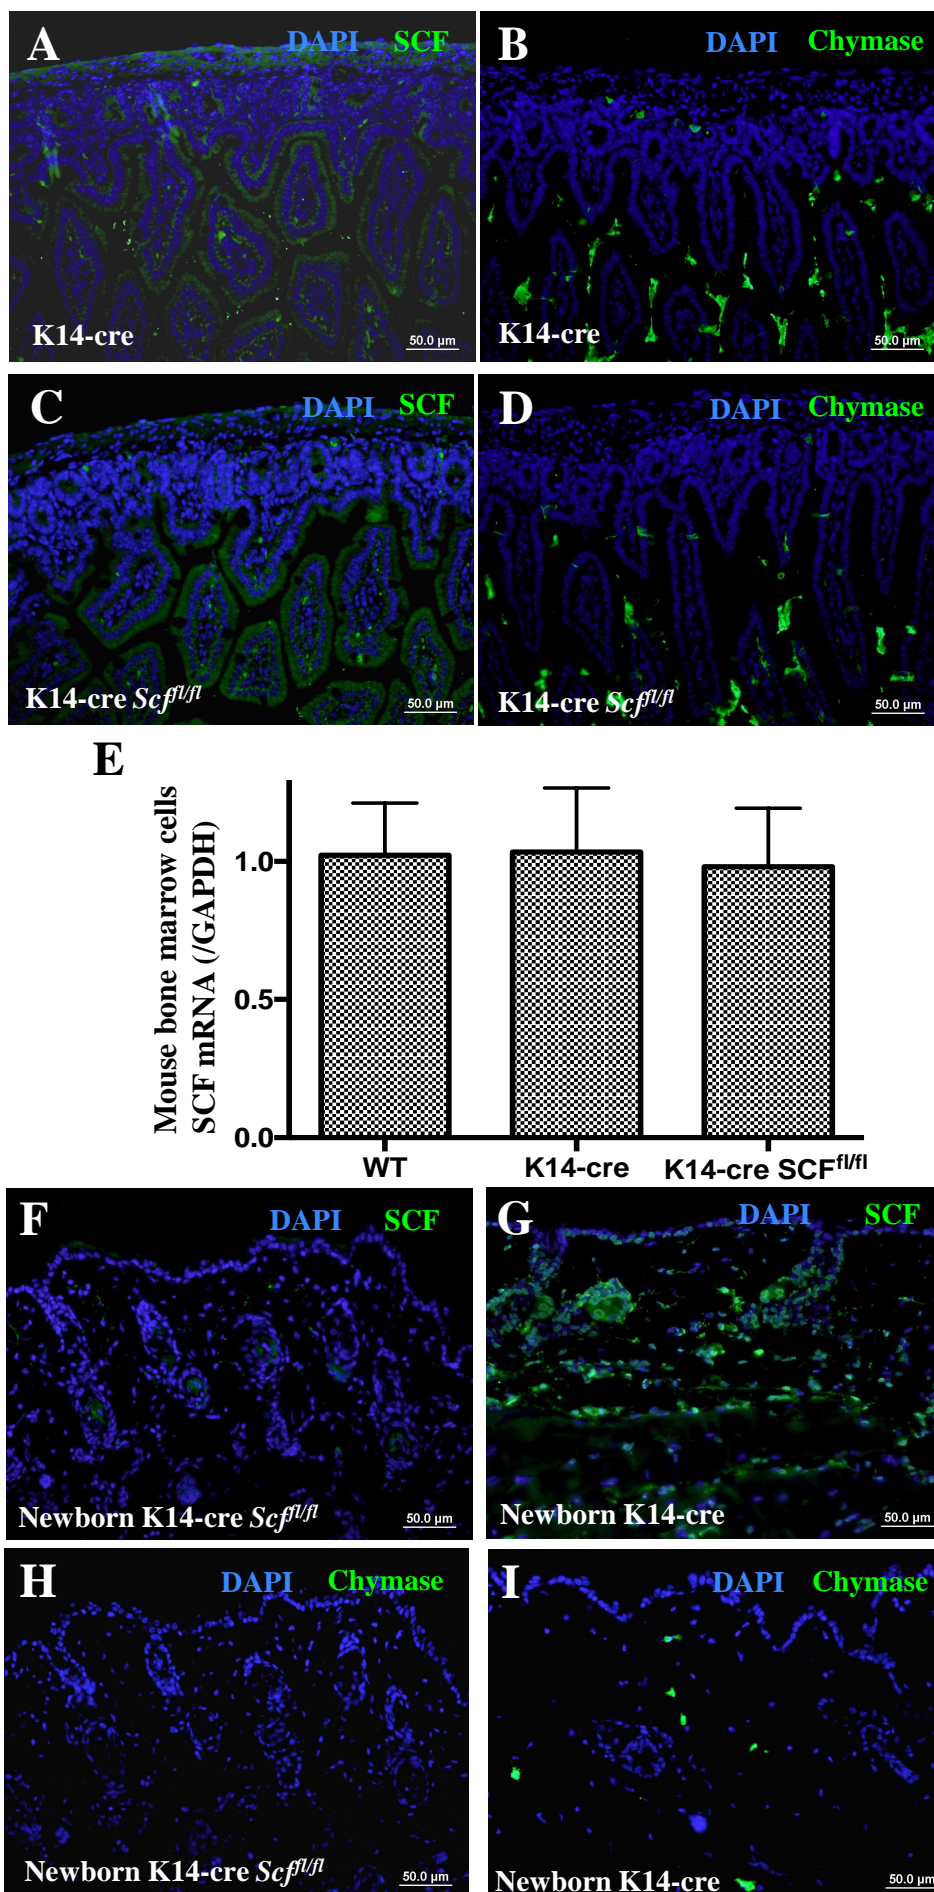

Supplement: NIHMS823223-supplement-supplement_1.pdf [file NIHMS823223-supplement-supplement_1.pdf]
